# Supplementary material
Source: PubMed Central journal article supplement (PMC1413944)

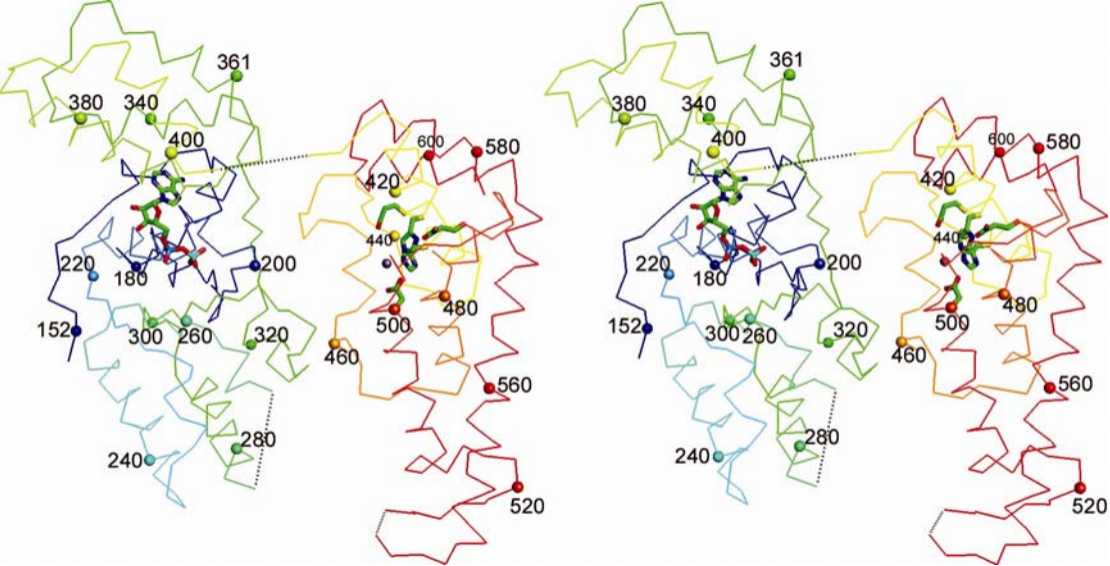

Supplement: pnas_0600031103_2.pdf [file pnas_0600031103_2.pdf]

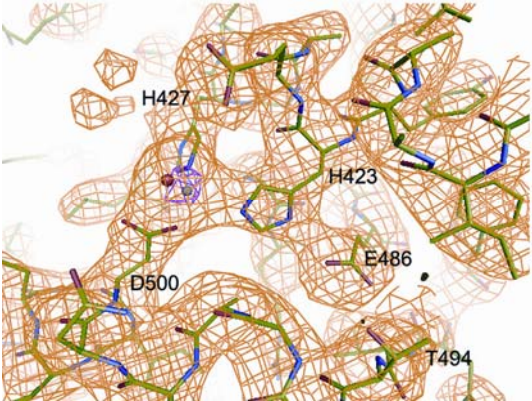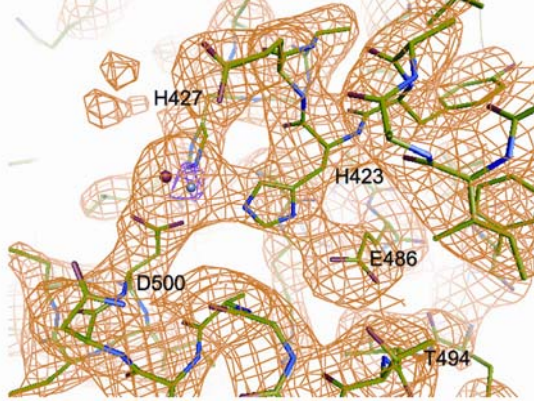

Supplement: pnas_0600031103_3.pdf [file pnas_0600031103_3.pdf]
